# Supplementary material for: Rare-Earth Doped Particles as Dual-Modality Contrast Agent for Minimally-Invasive Luminescence and Dual-Wavelength Photoacoustic Imaging
Source: PubMed Central journal article supplement — Sci Rep. 2014 Oct 9;4:6562. doi: 10.1038/srep06562 (PMC4190509; doi:10.1038/srep06562), 2014-10-09
Supplement: srep06562-s1.pdf [file srep06562-s1.pdf]

# Rare-Earth Doped Particles as Dual-Modality Contrast Agent for Minimally-Invasive Luminescence and Dual-Wavelength Photoacoustic Imaging

Yang Sheng<sup>1</sup>, Lun-De Liao<sup>2</sup>, Nitish Thakor<sup>2,3</sup>, Mei Chee Tan<sup>1,\*</sup>

1. Engineering Product Development, Singapore University of Technology and Design, Singapore, 20 Dover Drive, Singapore 138682
2. Singapore Institute for Neurotechnology (SINAPSE), National University of Singapore, 28 Medical Drive, #05-COR, Singapore 117456
3. Department of Biomedical Engineering, Johns Hopkins University, Traylor 701/720 Rutland Ave, Baltimore, MD 21205, U.S.A

\*To whom correspondence should be addressed. Email: meichee.tan@sutd.edu.sg

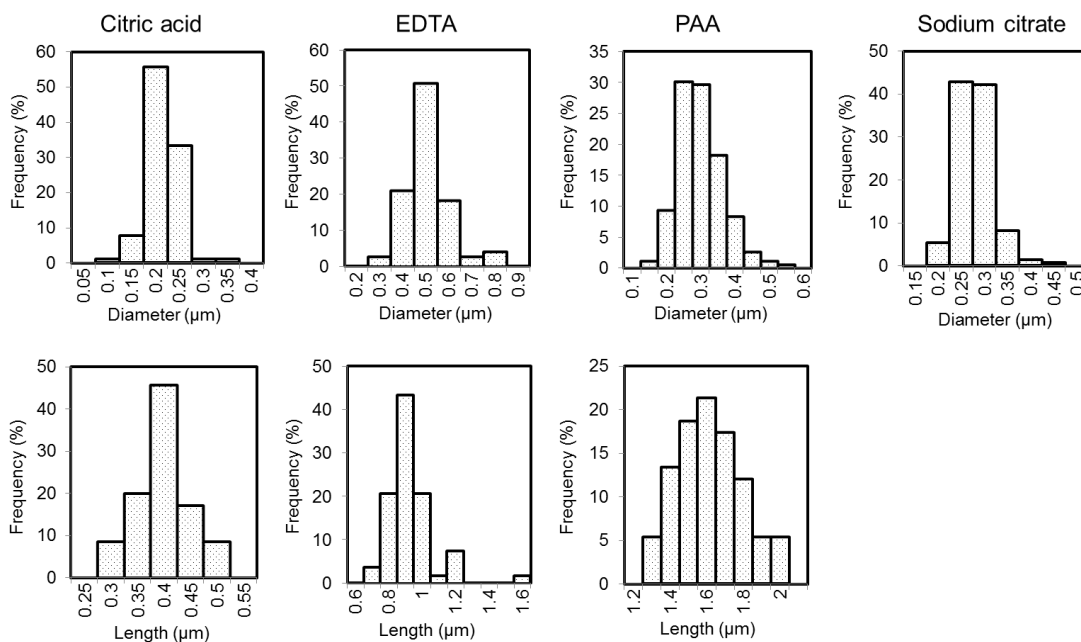

Figure S1 Size distribution of NaYF<sub>4</sub>:Yb,Er particles synthesized with surfactants of citric acid, PAA, EDTA and sodium citrate (Ln:Surf = 1:10 mol/mol).

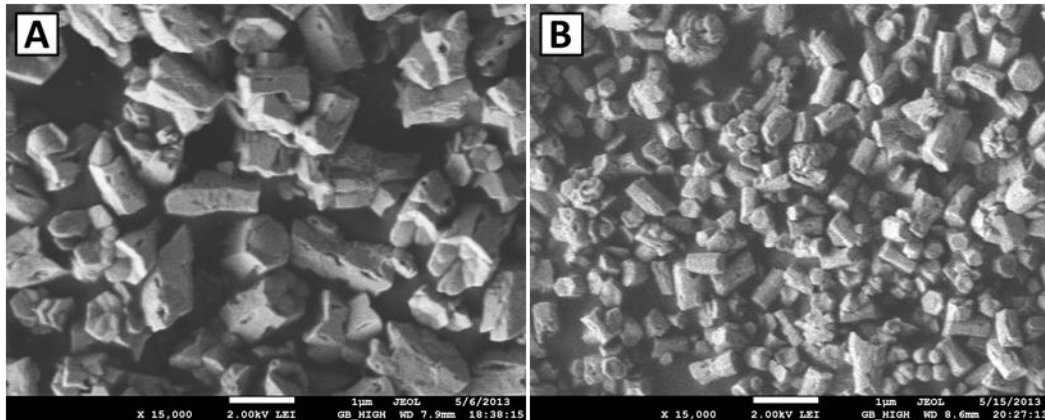

Figure S2 SEM images of  $\text{NaYF}_4:\text{Yb,Er}$  short rods prepared with citric acid, where  $\text{Ln}:\text{citric acid} = (\text{A}) 1:1$  and  $(\text{B}) 1:5$  mol/mol.

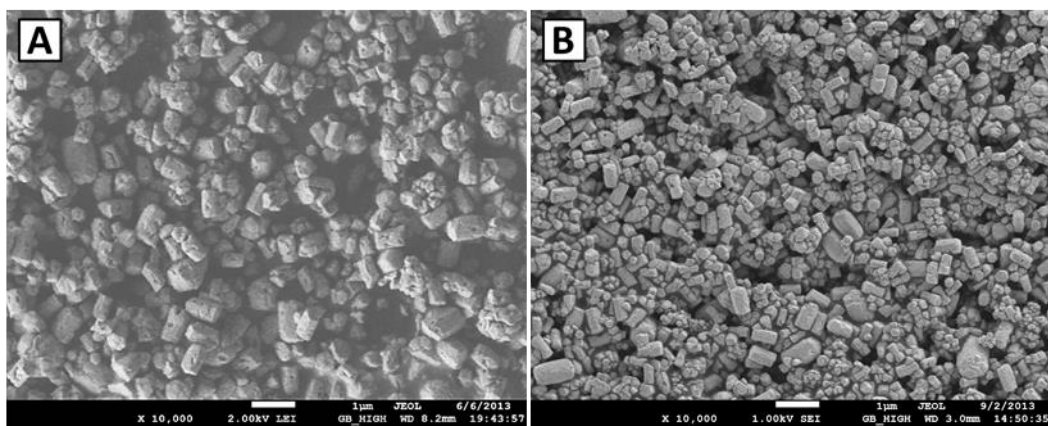

Figure S3 SEM images of  $\text{NaYF}_4:\text{Yb,Er}$  short rods prepared with EDTA, where  $\text{Ln}:\text{EDTA} = (\text{A}) 1:1$  and  $(\text{B}) 1:5$  mol/mol.

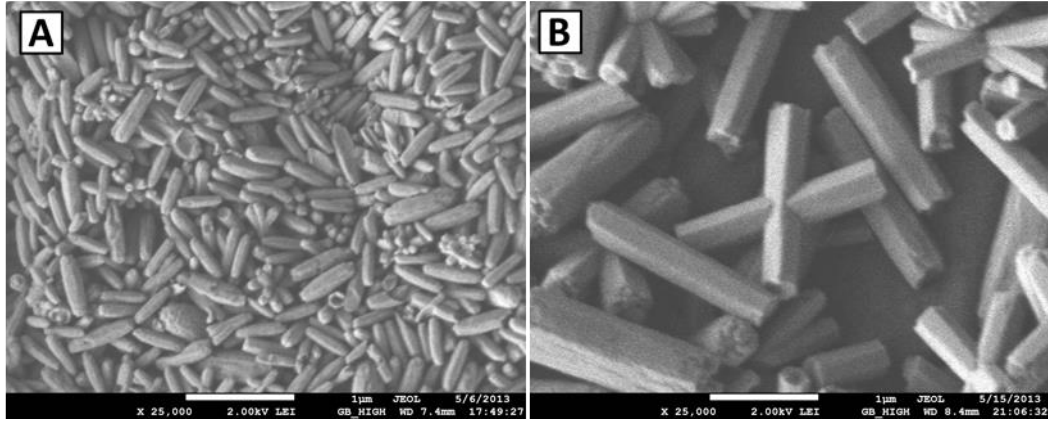

Figure S4 SEM images of  $\text{NaYF}_4:\text{Yb,Er}$  rods prepared with PAA, where  $\text{Ln}:\text{PAA} =$  (A) 1:1 and (B) 1:5 mol/mol.

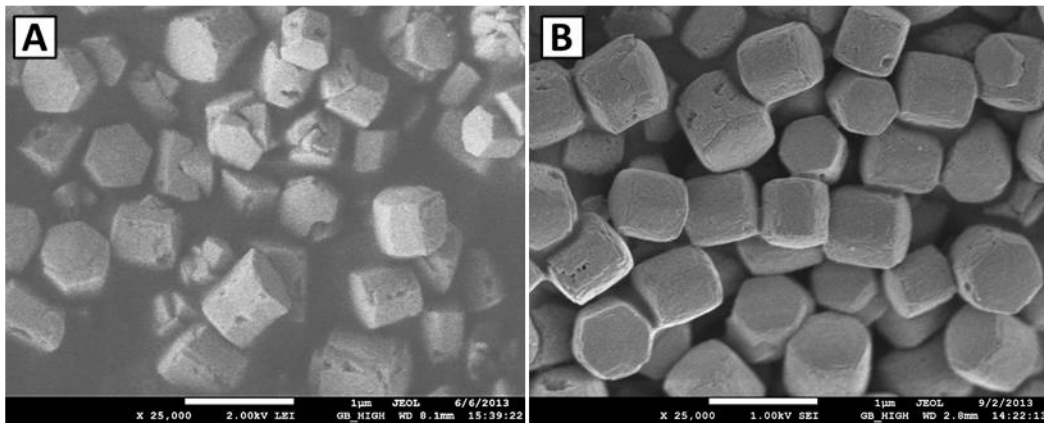

Figure S5 SEM images of  $\text{NaYF}_4:\text{Yb,Er}$  hexagons prepared with sodium citrate, where  $\text{Ln}:\text{sodium citrate} =$  (A) 1:1 and (B) 1:5 mol/mol.

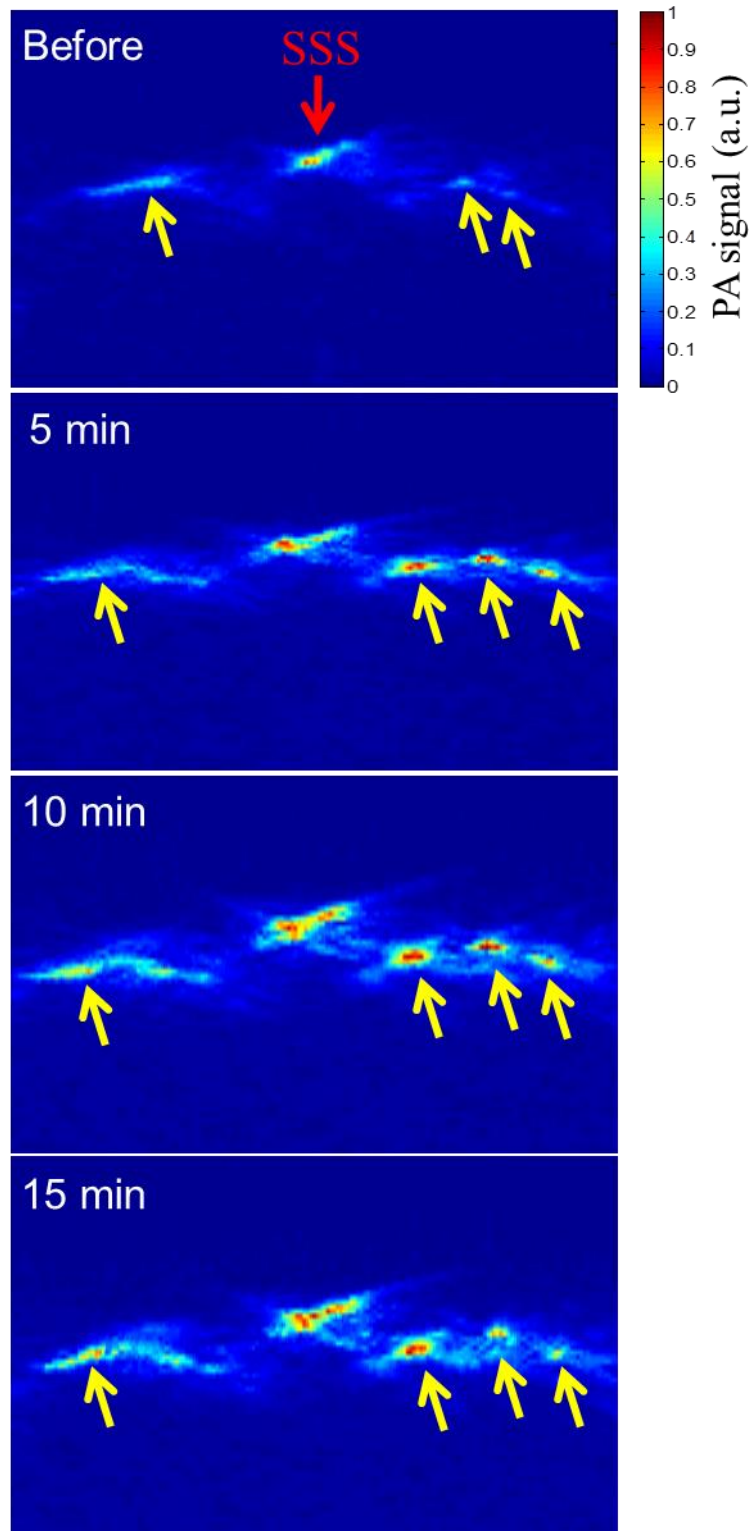

Figure S6 Photoacoustic images of the rat's blood vessels around the superior sagittal sinus (SSS) at different times after the injection of  $\text{NaYF}_4:\text{Yb,Er}$  particles.

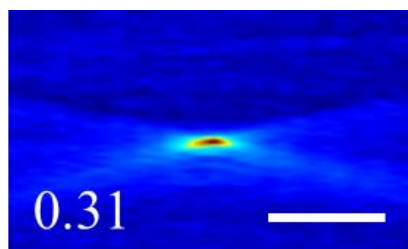

Figure S7 PA images and signals measured upon excitation at 975 nm for nano-sized  $\text{NaYF}_4:\text{Yb,Er}/\text{NaYF}_4$  particles at the concentration of 33.3 mg/mL. (Scale bar: 100  $\mu\text{m}$ )

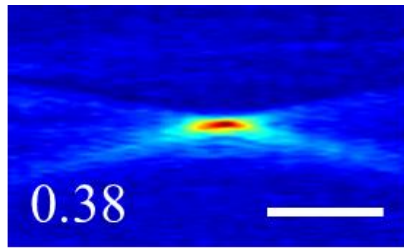

Figure S8 PA images and signals of NaYF<sub>4</sub>:Yb,Tm particles measured upon excitation at 800 nm. (Scale bar: 100  $\mu$ m)
